# Supplementary material for: Mortality trends in idiopathic pulmonary fibrosis in Europe between 2013 and 2018
Source: PubMed Central journal article supplement (PMC11339406; doi:10.1183/13993003.02080-2023), 2024-08-22
Supplement: ERJ-02080-2023.Supplement.pdf [file ERJ-02080-2023.Supplement.pdf]

## **Supplementary Materials**

|                            |         |
|----------------------------|---------|
| Supplementary material S1  | page 2  |
| Supplementary material S2  | page 4  |
| Supplementary material S3  | page 5  |
| Supplementary material S4  | page 7  |
| Supplementary material S5  | page 8  |
| Supplementary material S6  | page 9  |
| Supplementary material S7  | page 10 |
| Supplementary material S8  | page 11 |
| Supplementary material S9  | page 12 |
| Supplementary material S10 | page 13 |
| Supplementary material S11 | page 14 |
| Supplementary material S12 | page 15 |
| Supplementary material S13 | page 16 |
| Supplementary material S14 | page 17 |
| Supplementary material S15 | page 18 |
| Supplementary material S16 | page 19 |
| Supplementary material S17 | page 20 |

**Supplementary Table S1:** the table contains an extract of the entire dataset. We extracted Austrian data from 2013 to 2018 as sample of the entire dataset.

| sex    | year | country | age_cat | J841_deaths | J84_deaths | pop     |
|--------|------|---------|---------|-------------|------------|---------|
| male   | 2013 | Austria | 0-54y   | 4           | 4          | 2987403 |
| male   | 2013 | Austria | 55-59y  | 2           | 3          | 263952  |
| male   | 2013 | Austria | 60-64y  | 7           | 7          | 227856  |
| male   | 2013 | Austria | 65-69y  | 8           | 8          | 194150  |
| male   | 2013 | Austria | 70-74y  | 22          | 24         | 197769  |
| male   | 2013 | Austria | 75-79y  | 22          | 24         | 111446  |
| male   | 2013 | Austria | 80-84y  | 12          | 15         | 84574   |
| male   | 2013 | Austria | >85y    | 21          | 21         | 56472   |
| female | 2013 | Austria | 0-54y   | 1           | 1          | 2926022 |
| female | 2013 | Austria | 55-59y  | 1           | 2          | 274449  |
| female | 2013 | Austria | 60-64y  | 3           | 3          | 244921  |
| female | 2013 | Austria | 65-69y  | 6           | 8          | 218377  |
| female | 2013 | Austria | 70-74y  | 2           | 3          | 234131  |
| female | 2013 | Austria | 75-79y  | 5           | 7          | 149017  |
| female | 2013 | Austria | 80-84y  | 14          | 15         | 134093  |
| female | 2013 | Austria | >85y    | 19          | 20         | 147228  |
| male   | 2014 | Austria | 0-54y   | 2           | 3          | 2994017 |
| male   | 2014 | Austria | 55-59y  | 1           | 1          | 274129  |
| male   | 2014 | Austria | 60-64y  | 5           | 5          | 226712  |
| male   | 2014 | Austria | 65-69y  | 7           | 7          | 197962  |
| male   | 2014 | Austria | 70-74y  | 27          | 29         | 202871  |
| male   | 2014 | Austria | 75-79y  | 15          | 15         | 115075  |
| male   | 2014 | Austria | 80-84y  | 26          | 27         | 84663   |
| male   | 2014 | Austria | >85y    | 22          | 26         | 59910   |
| female | 2014 | Austria | 0-54y   | 1           | 1          | 2928982 |
| female | 2014 | Austria | 55-59y  | 2           | 2          | 283947  |
| female | 2014 | Austria | 60-64y  | 2           | 3          | 243341  |
| female | 2014 | Austria | 65-69y  | 6           | 7          | 222458  |
| female | 2014 | Austria | 70-74y  | 6           | 6          | 240554  |
| female | 2014 | Austria | 75-79y  | 17          | 20         | 151566  |
| female | 2014 | Austria | 80-84y  | 14          | 16         | 132544  |
| female | 2014 | Austria | >85y    | 16          | 16         | 149055  |
| male   | 2015 | Austria | 0-54y   | 3           | 4          | 3009998 |
| male   | 2015 | Austria | 55-59y  | 2           | 3          | 286315  |
| male   | 2015 | Austria | 60-64y  | 6           | 8          | 228629  |
| male   | 2015 | Austria | 65-69y  | 6           | 7          | 200502  |
| male   | 2015 | Austria | 70-74y  | 19          | 23         | 194901  |
| male   | 2015 | Austria | 75-79y  | 25          | 26         | 132195  |
| male   | 2015 | Austria | 80-84y  | 27          | 29         | 84383   |
| male   | 2015 | Austria | >85y    | 18          | 18         | 63474   |
| female | 2015 | Austria | 0-54y   | 3           | 3          | 2936269 |
| female | 2015 | Austria | 60-64y  | 4           | 5          | 245266  |
| female | 2015 | Austria | 65-69y  | 8           | 8          | 224358  |
| female | 2015 | Austria | 70-74y  | 4           | 4          | 231975  |
| female | 2015 | Austria | 75-79y  | 13          | 16         | 170183  |
| female | 2015 | Austria | 80-84y  | 15          | 16         | 130588  |
| female | 2015 | Austria | >85y    | 17          | 18         | 151369  |
| male   | 2016 | Austria | 0-54y   | 1           | 1          | 3052884 |
| male   | 2016 | Austria | 55-59y  | 2           | 4          | 298349  |
| male   | 2016 | Austria | 60-64y  | 6           | 7          | 233768  |
| male   | 2016 | Austria | 65-69y  | 17          | 18         | 211306  |
| male   | 2016 | Austria | 70-74y  | 17          | 17         | 176970  |
| male   | 2016 | Austria | 75-79y  | 20          | 22         | 149322  |
| male   | 2016 | Austria | 80-84y  | 21          | 22         | 83394   |
| male   | 2016 | Austria | >85y    | 19          | 20         | 66560   |
| female | 2016 | Austria | 0-54y   | 2           | 3          | 2955075 |
| female | 2016 | Austria | 60-64y  | 4           | 6          | 250528  |
| female | 2016 | Austria | 65-69y  | 4           | 4          | 235642  |
| female | 2016 | Austria | 70-74y  | 10          | 11         | 211581  |
| female | 2016 | Austria | 75-79y  | 18          | 20         | 190031  |
| female | 2016 | Austria | 80-84y  | 6           | 7          | 128018  |
| female | 2016 | Austria | >85y    | 11          | 13         | 152143  |
| male   | 2017 | Austria | 0-54y   | 1           | 3          | 3060079 |
| male   | 2017 | Austria | 55-59y  | 7           | 7          | 309458  |
| male   | 2017 | Austria | 60-64y  | 6           | 6          | 243935  |
| male   | 2017 | Austria | 65-69y  | 3           | 4          | 213857  |
| male   | 2017 | Austria | 70-74y  | 17          | 18         | 169449  |
| male   | 2017 | Austria | 75-79y  | 35          | 41         | 162458  |
| male   | 2017 | Austria | 80-84y  | 19          | 21         | 83888   |
| male   | 2017 | Austria | >85y    | 19          | 22         | 69317   |
| female | 2017 | Austria | 55-59y  | 2           | 5          | 313528  |
| female | 2017 | Austria | 60-64y  | 4           | 4          | 261045  |
| female | 2017 | Austria | 65-69y  | 1           | 2          | 239057  |
| female | 2017 | Austria | 70-74y  | 10          | 10         | 201473  |

|        |      |         |        |    |    |         |
|--------|------|---------|--------|----|----|---------|
| female | 2017 | Austria | 75-79y | 17 | 19 | 205723  |
| female | 2017 | Austria | 80-84y | 12 | 13 | 126673  |
| female | 2017 | Austria | >85y   | 18 | 20 | 153622  |
| male   | 2018 | Austria | 0-54y  | 2  | 2  | 3052552 |
| male   | 2018 | Austria | 55-59y | 1  | 2  | 321042  |
| male   | 2018 | Austria | 60-64y | 1  | 1  | 253644  |
| male   | 2018 | Austria | 65-69y | 7  | 8  | 211851  |
| male   | 2018 | Austria | 70-74y | 25 | 27 | 173824  |
| male   | 2018 | Austria | 75-79y | 32 | 34 | 168992  |
| male   | 2018 | Austria | 80-84y | 17 | 20 | 85112   |
| male   | 2018 | Austria | >85y   | 38 | 44 | 71501   |
| female | 2018 | Austria | 0-54y  | 2  | 2  | 2954555 |
| female | 2018 | Austria | 55-59y | 3  | 3  | 323570  |
| female | 2018 | Austria | 60-64y | 4  | 4  | 269912  |
| female | 2018 | Austria | 65-69y | 2  | 2  | 236340  |
| female | 2018 | Austria | 70-74y | 9  | 12 | 206227  |
| female | 2018 | Austria | 75-79y | 21 | 22 | 214392  |
| female | 2018 | Austria | 80-84y | 15 | 15 | 125401  |
| female | 2018 | Austria | >85y   | 18 | 19 | 153352  |

## Supplementary Material S2

### *Global Burden of Disease dataset*

The data utilised for this observational analysis of ILD were sourced from the Global Burden of Disease (GBD) database, which aggregates mortality and disability data pertaining to a range of global health issues. This includes information such as deaths, death rates, years of life lost due to premature mortality, prevalence, and incidence rates.

The GBD methodology is clearly explained on the website (<https://www.healthdata.org/data-tools-practices/data-collection>).

In summary, the GBD employs a comprehensive approach that incorporates systematic reviews, survey data, disease registries, hospital administrative records, claims data, as well as inpatient and outpatient records, alongside case notifications to estimate disease incidence (for the GBD methodology regarding ILDs and sarcoidosis data collection is provided on pages 888-892 in the following document: [https://www.thelancet.com/cms/10.1016/S0140-6736\(20\)30925-9/attachment/7709ecbd-5dbc-4da6-93b2-3fd0bedc16cc/mmc1.pdf](https://www.thelancet.com/cms/10.1016/S0140-6736(20)30925-9/attachment/7709ecbd-5dbc-4da6-93b2-3fd0bedc16cc/mmc1.pdf)). Disease classifications within the GBD database adhere to the International Classification of Diseases (ICD) coding system. The collation and dissemination of data are managed by the GBD Collaborators, and the datasets are made publicly accessible for further analysis.

We queried the data on the 1<sup>st</sup> level cause, selecting the same 24 European Countries, and directly extracted the prevalence rates for each year and for each Country. We used prevalence data for ILDs and sarcoidosis (ICD-10 codes “J84 – *other interstitial lung diseases*” + “D86 – *sarcoidosis*”) as a proxy. We extracted the average annual prevalence rate change for each European Country for the interval 2010-2019, as no more restricted intervals were possible.

### Supplementary Material S3

#### *Segmented regression model*

The model assesses the overall trends in mortality, initially with no Joinpoints, and tests for significant changes in the model with sequential addition of points where there is significant change in the slope of the line. The model also computes an estimated average annual percent change for each trend by fitting a regression line to the natural logarithm of the rates. The log-linear transformation allows us to approximate normal distributions and, by estimating the annual percentage change, we were able to assess change in mortality trend at a constant percentage per year.

On the Joinpoint software input tabs, we used the following options on the basis of Irimata et al. indications (Irimata KE, Bastian BA, Clarke TC, Curtin SC, Badwe R, Rui P. Guidance for Selecting Model Options in the National Cancer Institute Joinpoint Regression Software. *Vital Health Stat 1*. 2022 Oct;(194):1-22. PMID: 36255743):

- *Heteroscedastic/correlated errors option (Input File tab)* → we used Standard Error (Provided): this option is the loosest as it allows the errors to be both homoscedastic and heteroscedastic, based on the variance structure provided in the data file. Mortality data are suggested to be treated as uncorrelated as no year-on-year correlation is supposed.
- *Log transformation (Input File tab)* → we applied the log transformation option, as it best suited our need to obtain the relative differences and discuss the APCs, rather than looking at absolute rates.
- *Modelling method and constraints (Method and Parameters tab)* → we adopted the Grid model in this case and used the following constraints: minimum number of observations from a joinpoint to either end of the data = 2; minimum number of observations between two joinpoints = 1; number of points to place between adjacent observed values in the grid search = 0.

- Number of joinpoints (minimum and maximum number of joinpoints) (Method and Parameters tab)

→ we used 0 as minimum number of joinpoint and increased to 1 the number of maximum joinpoints (default 0 for less than 7 observation points – years in our case).

- Model selection method (Method and Parameters tab) → as we had less than 10 time points, we applied the Bayesian Information Criterion (BIC) model.

**Supplementary Material S4** Overall population in Europe in 2017 (reference population), sex distribution for each age group

|                          | <i>Female</i> |            | <i>Male</i> |            |
|--------------------------|---------------|------------|-------------|------------|
|                          | <i>(n)</i>    | <i>(%)</i> | <i>(n)</i>  | <i>(%)</i> |
| <i>Total population</i>  | 241821972     |            | 238760288   |            |
| <i>Age group (years)</i> |               |            |             |            |
| 0-54                     | 156397934     | 65         | 166765495   | 70         |
| 55-59                    | 16074241      | 7          | 16009169    | 7          |
| 60-64                    | 14924509      | 6          | 14748361    | 6          |
| 65-69                    | 14579834      | 6          | 13277609    | 6          |
| 70-74                    | 11731077      | 5          | 9878339     | 4          |
| 75-79                    | 10744389      | 4          | 8279014     | 3          |
| 80-84                    | 8499175       | 4          | 5587088     | 2          |
| > 85                     | 8870813       | 4          | 4215213     | 2          |

n: number of people

## Supplementary Material S5

### *Direct standardisation method*

For direct standardisation we used the STATA command *dstdize* using the following syntax:

`dstdize charvar popvar stratavars, by(groupvars) [dstdize_options]` where *charvar* is the characteristic (i.e., IPF deaths) to be standardised across different subpopulations identified by *groupvars* (i.e., country and year), *popvar* defines the weights used in standardization (i.e., number of residents in each country and in each year), *stratavars* defines the strata across which the weights are to be averaged in *dstdize* (i.e., sex and age groups).

Therefore, with this command, it is possible to perform a direct standardisation adjusted for covariates of interest. We used the following code:

```
dstdize deaths population age sex using ("reference population"), by (country year).
```

### *Crude mortality rates and rate ratios calculation*

We calculated the crude mortality rates dividing the number of J84.1 deaths by the total resident population for each year and for each country.

To obtain mortality rate ratios in each country, we compared the adjusted mortality rate of a certain category with the adjusted mortality rate of a selected reference (i.e., male vs female).



**Supplementary Material S6** Overall row deaths for idiopathic pulmonary fibrosis-clinical syndrome and overall population in Europe in 2013–2018, age- and sex- stratum data

|                          | 2013       |     | 2014       |     |            |     | 2015       |     |            |     | 2016       |     |            |     | 2017       |     |            |     | 2018       |     |            |     |            |     |
|--------------------------|------------|-----|------------|-----|------------|-----|------------|-----|------------|-----|------------|-----|------------|-----|------------|-----|------------|-----|------------|-----|------------|-----|------------|-----|
|                          | Row deaths |     | Population |     | Row deaths |     | Population |     | Row deaths |     | Population |     | Row deaths |     | Population |     | Row deaths |     | Population |     | Row deaths |     | Population |     |
|                          | (n)        | (%) | (n)        | (%) | (n)        | (%) | (n)        | (%) | (n)        | (%) | (n)        | (%) | (n)        | (%) | (n)        | (%) | (n)        | (%) | (n)        | (%) | (n)        | (%) | (n)        | (%) |
| <i>Total population</i>  | 16148      |     | 468472680  |     | 16877      |     | 480956851  |     | 17885      |     | 480896141  |     | 18331      |     | 483854733  |     | 18500      |     | 480582260  |     | 17026      |     | 414222048  |     |
| <i>Sex</i>               |            |     |            |     |            |     |            |     |            |     |            |     |            |     |            |     |            |     |            |     |            |     |            |     |
| Male                     | 9664       | 60  | 230178364  | 49  | 10215      | 61  | 235055321  | 49  | 10825      | 61  | 236565910  | 49  | 11111      | 61  | 238982812  | 49  | 11361      | 61  | 238760288  | 50  | 10608      | 62  | 203144304  | 49  |
| Female                   | 6484       | 40  | 238294316  | 51  | 6662       | 39  | 245901530  | 51  | 7060       | 39  | 244330231  | 51  | 7220       | 39  | 244871921  | 51  | 7139       | 39  | 241821972  | 50  | 6418       | 38  | 211077744  | 51  |
| <i>Age group (years)</i> |            |     |            |     |            |     |            |     |            |     |            |     |            |     |            |     |            |     |            |     |            |     |            |     |
| 0-54                     | 386        | 2   | 322096859  | 69  | 332        | 2   | 329593231  | 69  | 339        | 2   | 327940392  | 68  | 382        | 2   | 329891609  | 68  | 320        | 2   | 323163429  | 67  | 319        | 2   | 274386270  | 66  |
| 55-59                    | 352        | 2   | 30935784   | 7   | 340        | 2   | 31779581   | 7   | 387        | 2   | 31557737   | 7   | 359        | 2   | 30855259   | 6   | 345        | 2   | 32083410   | 7   | 294        | 2   | 28698313   | 7   |
| 60-64                    | 759        | 5   | 29295806   | 6   | 752        | 4   | 29184857   | 6   | 739        | 4   | 29457368   | 6   | 791        | 4   | 29466348   | 6   | 753        | 4   | 29672870   | 6   | 687        | 4   | 26818567   | 6   |
| 65-69                    | 1268       | 8   | 23750775   | 5   | 1411       | 8   | 25514025   | 5   | 1401       | 8   | 25859972   | 5   | 1472       | 8   | 27555171   | 6   | 1406       | 8   | 27857443   | 6   | 1253       | 7   | 24041723   | 6   |
| 70-74                    | 2214       | 14  | 20811085   | 4   | 2336       | 14  | 21021855   | 4   | 2223       | 12  | 21413892   | 4   | 2257       | 12  | 20869382   | 4   | 2186       | 12  | 21609416   | 4   | 2310       | 14  | 19594322   | 5   |
| 75-79                    | 3270       | 20  | 17509183   | 4   | 3494       | 21  | 18506593   | 4   | 3710       | 21  | 18766139   | 4   | 3767       | 21  | 18978162   | 4   | 3718       | 20  | 19023403   | 4   | 3374       | 20  | 16865617   | 4   |
| 80-84                    | 3595       | 22  | 12922633   | 3   | 3724       | 22  | 13411361   | 3   | 4119       | 23  | 13602595   | 3   | 4162       | 23  | 13565775   | 3   | 4267       | 23  | 14086263   | 3   | 3889       | 23  | 12536690   | 3   |
| > 85                     | 4304       | 27  | 11150555   | 2   | 4488       | 27  | 11945348   | 2   | 4967       | 28  | 12298046   | 3   | 5141       | 28  | 12673027   | 3   | 5505       | 30  | 13086026   | 3   | 4900       | 29  | 11280546   | 3   |

n: number of deaths



Supplementary Material S8 Broader analysis: comparison between narrow ("J84.1") and broader band diagnosis codeset ("J84")

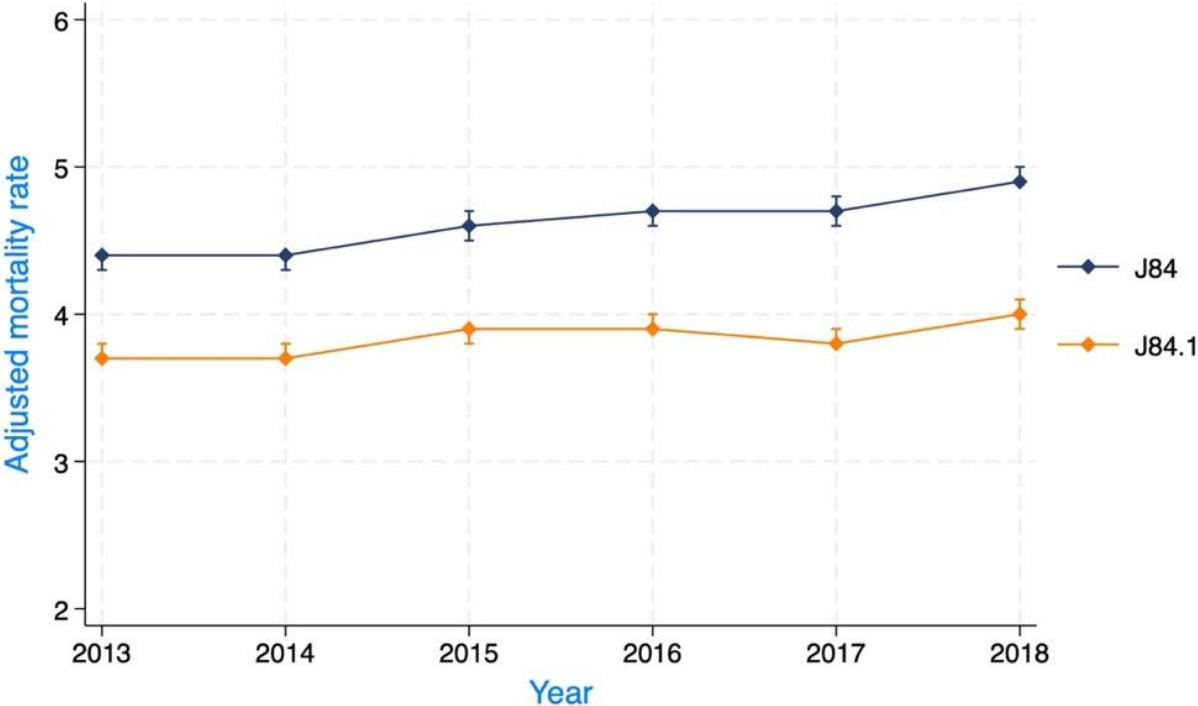

**Supplementary Material S9: Broader analysis: crude mortality rates broader band diagnosis “J84” in 24 European Countries in 2013–2018**

| Country           | Crude Mortality Rate per 100,000 Person-Years (95% CI) 2013 |             |                    | Crude Mortality Rate per 100,000 Person-Years (95% CI) 2014 |             |                    | Crude Mortality Rate per 100,000 Person-Years (95% CI) 2015 |             |                    | Crude Mortality Rate per 100,000 Person-Years (95% CI) 2016 |             |                    | Crude Mortality Rate per 100,000 Person-Years (95% CI) 2017 |             |                    | Crude Mortality Rate per 100,000 Person-Years (95% CI) 2018 |             |                    | Overall Crude Mortality Rate per 100,000 Person-Years (95% CI) 2013-2018 |             |                    |        |            |    |
|-------------------|-------------------------------------------------------------|-------------|--------------------|-------------------------------------------------------------|-------------|--------------------|-------------------------------------------------------------|-------------|--------------------|-------------------------------------------------------------|-------------|--------------------|-------------------------------------------------------------|-------------|--------------------|-------------------------------------------------------------|-------------|--------------------|--------------------------------------------------------------------------|-------------|--------------------|--------|------------|----|
|                   | Deaths                                                      | Crude rate  | CI                 | Deaths                                                      | Crude rate  | CI                 | Deaths                                                      | Crude rate  | CI                 | Deaths                                                      | Crude rate  | CI                 | Deaths                                                      | Crude rate  | CI                 | Deaths                                                      | Crude rate  | CI                 | Deaths                                                                   | Crude rate  | CI                 | Deaths | Crude rate | CI |
| Austria           | 165                                                         | 1.92        | (1.68-2.27)        | 184                                                         | 2.16        | (1.84-2.50)        | 188                                                         | 2.27        | (1.97-2.62)        | 175                                                         | 2.08        | (1.79-2.42)        | 195                                                         | 3.35        | (2.90-3.86)        | 217                                                         | 2.46        | (2.14-2.81)        | 1124                                                                     | 2.33        | (2.19-2.47)        |        |            |    |
| Belgium           | 396                                                         | 3.55        | (3.22-3.92)        | 355                                                         | 3.17        | (2.86-3.52)        | 375                                                         | 3.34        | (3.02-3.69)        | 425                                                         | 3.76        | (3.41-4.13)        | 407                                                         | 3.70        | (3.35-4.08)        | 439                                                         | 5.89        | (5.53-6.47)        | 2397                                                                     | 3.79        | (3.64-3.94)        |        |            |    |
| Bulgaria          | 33                                                          | 0.76        | (0.55-1.07)        | 29                                                          | 0.72        | (0.50-1.04)        | 14                                                          | 0.24        | (0.14-0.40)        | 10                                                          | 0.29        | (0.14-0.54)        | 17                                                          | 0.28        | (0.16-0.45)        | 24                                                          | 0.59        | (0.38-0.87)        | 127                                                                      | 0.46        | (0.38-0.54)        |        |            |    |
| Croatia           | 20                                                          | 0.51        | (0.33-0.79)        | 21                                                          | 3.29        | (2.14-5.04)        | 22                                                          | 2.05        | (1.35-3.11)        | 23                                                          | 0.96        | (0.61-1.44)        | 24                                                          | 0.97        | (0.62-1.45)        | 32                                                          | 2.25        | (1.54-3.17)        | 142                                                                      | 1.19        | (1.01-2.12)        |        |            |    |
| Denmark           | 137                                                         | 2.44        | (2.07-2.89)        | 160                                                         | 2.84        | (2.43-3.32)        | 165                                                         | 3.01        | (2.58-3.51)        | 194                                                         | 3.40        | (2.94-3.91)        | 199                                                         | 5.59        | (4.84-6.43)        | 248                                                         | 4.43        | (3.90-5.02)        | 1103                                                                     | 3.49        | (3.29-3.71)        |        |            |    |
| Estonia           | N/A                                                         | N/A         | N/A                | 7                                                           | 1.21        | (0.57-2.53)        | 9                                                           | 13.07       | (6.80-25.12)       | 5                                                           | 9.25        | (3.00-21.59)       | 4                                                           | 4.88        | (1.33-12.48)       | 21                                                          | 3.05        | (1.89-4.66)        | 46                                                                       | 3.12        | (2.28-4.16)        |        |            |    |
| Finland           | 278                                                         | 7.63        | (6.78-8.58)        | 276                                                         | 7.68        | (6.82-8.64)        | 279                                                         | 7.56        | (6.72-8.50)        | 352                                                         | 9.48        | (8.51-10.52)       | 309                                                         | 8.70        | (7.76-9.73)        | 341                                                         | 9.08        | (8.14-10.01)       | 1835                                                                     | 8.36        | (7.98-8.75)        |        |            |    |
| France            | 1844                                                        | 2.81        | (2.87-2.94)        | 1946                                                        | 2.81        | (2.81-3.07)        | 2072                                                        | 3.12        | (2.99-3.25)        | 2108                                                        | 3.16        | (3.03-3.30)        | 2150                                                        | 3.22        | (3.08-3.36)        | N/A                                                         | N/A         | N/A                | 10120                                                                    | 3.05        | (2.99-3.11)        |        |            |    |
| Germany           | 2977                                                        | 3.70        | (3.57-3.83)        | 2997                                                        | 3.71        | (3.58-3.85)        | 3195                                                        | 3.93        | (3.80-4.07)        | 3359                                                        | 4.09        | (3.95-4.23)        | 3503                                                        | 4.24        | (4.11-4.39)        | 3526                                                        | 4.26        | (4.12-4.40)        | 19557                                                                    | 3.99        | (3.94-4.05)        |        |            |    |
| Greece            | N/A                                                         | N/A         | N/A                | 416                                                         | 3.81        | (3.46-4.19)        | 475                                                         | 4.37        | (4.00-4.79)        | 436                                                         | 4.19        | (3.80-4.60)        | 478                                                         | 4.44        | (4.05-4.86)        | 437                                                         | 4.07        | (3.70-4.47)        | 2242                                                                     | 4.17        | (4.00-4.35)        |        |            |    |
| Hungary           | 182                                                         | 1.84        | (1.59-2.12)        | 164                                                         | 1.66        | (1.42-1.93)        | 199                                                         | 2.02        | (1.76-2.32)        | 197                                                         | 2.00        | (1.73-8.67)        | 200                                                         | 2.04        | (1.77-2.34)        | 232                                                         | 2.44        | (2.14-2.78)        | 1174                                                                     | 2.00        | (1.89-2.12)        |        |            |    |
| Ireland           | 302                                                         | 6.55        | (5.83-7.33)        | 344                                                         | 7.42        | (6.67-8.24)        | 339                                                         | 11.75       | (10.57-13.08)      | 370                                                         | 7.83        | (7.05-8.67)        | 409                                                         | 14.43       | (13.07-15.90)      | 409                                                         | 13.58       | (12.30-14.97)      | 2173                                                                     | 9.57        | (9.17-9.98)        |        |            |    |
| Italy             | 2268                                                        | 3.80        | (3.65-3.96)        | 2278                                                        | 3.75        | (3.60-3.90)        | 2461                                                        | 4.05        | (3.89-4.21)        | 2426                                                        | 4.00        | (3.84-4.16)        | 2677                                                        | 4.42        | (4.25-4.59)        | 2836                                                        | 4.69        | (4.52-4.86)        | 14946                                                                    | 4.12        | (4.05-4.18)        |        |            |    |
| Luxembourg        | 11                                                          | 17.17       | (9.51-31.01)       | 13                                                          | 22.01       | (12.78-37.90)      | 10                                                          | 16.85       | (8.10-30.99)       | 12                                                          | 27.63       | (14.27-48.26)      | 12                                                          | 24.26       | (12.54-42.38)      | 15                                                          | 18.99       | (10.63-31.32)      | 73                                                                       | 20.60       | (16.15-25.90)      |        |            |    |
| Latvia            | 14                                                          | 1.38        | (0.82-2.33)        | 7                                                           | 5.69        | (2.71-11.94)       | 14                                                          | 4.06        | (2.22-6.81)        | 5                                                           | 0.69        | (0.22-1.60)        | 9                                                           | 3.24        | (1.48-6.15)        | 12                                                          | 0.78        | (0.40-1.37)        | 61                                                                       | 1.52        | (1.16-1.95)        |        |            |    |
| Netherlands       | 535                                                         | 3.19        | (2.93-3.47)        | 544                                                         | 3.23        | (2.97-3.52)        | 629                                                         | 3.72        | (3.44-4.02)        | 634                                                         | 3.87        | (3.57-4.18)        | 626                                                         | 3.66        | (3.38-3.96)        | 677                                                         | 3.94        | (3.65-4.25)        | 3645                                                                     | 3.60        | (3.49-3.72)        |        |            |    |
| Poland            | 396                                                         | 1.04        | (0.94-1.15)        | 418                                                         | 1.01        | (1.00-1.21)        | 439                                                         | 1.16        | (1.05-1.27)        | 466                                                         | 1.23        | (1.12-1.34)        | 515                                                         | 1.36        | (1.24-1.48)        | 470                                                         | 1.24        | (1.13-1.35)        | 2704                                                                     | 1.19        | (1.14-1.23)        |        |            |    |
| Portugal          | 348                                                         | 3.32        | (2.99-3.69)        | 402                                                         | 3.85        | (3.50-4.25)        | 421                                                         | 4.06        | (3.68-4.46)        | 469                                                         | 4.54        | (4.13-4.96)        | 408                                                         | 3.96        | (3.58-4.36)        | 403                                                         | 3.92        | (3.54-4.32)        | 2451                                                                     | 3.94        | (3.78-4.10)        |        |            |    |
| Romania           | 213                                                         | 1.06        | (0.93-1.22)        | 190                                                         | 0.95        | (0.83-1.10)        | 250                                                         | 1.30        | (1.14-1.47)        | 292                                                         | 1.48        | (1.31-1.66)        | 233                                                         | 1.19        | (1.04-1.35)        | 269                                                         | 1.38        | (1.22-1.55)        | 1447                                                                     | 1.22        | (1.16-1.29)        |        |            |    |
| Slovenia          | 45                                                          | 7.87        | (5.87-10.53)       | 54                                                          | 2.82        | (2.17-3.69)        | 52                                                          | 8.84        | (6.60-11.59)       | 59                                                          | 10.68       | (8.13-13.78)       | 57                                                          | 13.70       | (10.38-17.75)      | 75                                                          | 13.69       | (10.77-17.16)      | 342                                                                      | 7.46        | (6.69-8.29)        |        |            |    |
| Slovakia          | 78                                                          | 1.49        | (1.20-1.86)        | 91                                                          | 1.68        | (1.36-2.06)        | 84                                                          | 1.56        | (1.24-1.93)        | 97                                                          | 1.85        | (1.50-2.26)        | 74                                                          | 1.46        | (1.15-1.84)        | 99                                                          | 2.87        | (2.34-3.50)        | 523                                                                      | 1.76        | (1.61-1.91)        |        |            |    |
| Spain             | 2275                                                        | 4.87        | (4.67-5.07)        | 2362                                                        | 5.08        | (4.88-5.29)        | 2552                                                        | 5.49        | (5.28-5.71)        | 2627                                                        | 5.56        | (5.44-5.88)        | 2717                                                        | 5.84        | (5.62-6.06)        | 2648                                                        | 5.68        | (5.46-5.90)        | 15181                                                                    | 5.43        | (5.35-5.52)        |        |            |    |
| Sweden            | 423                                                         | 6.67        | (6.062-7.33)       | 442                                                         | 4.58        | (4.17-5.03)        | 519                                                         | 5.32        | (4.88-5.80)        | 515                                                         | 5.39        | (4.93-5.31)        | 534                                                         | 5.34        | (4.90-5.82)        | 539                                                         | 5.33        | (4.89-5.80)        | 2972                                                                     | 5.36        | (5.17-5.56)        |        |            |    |
| UK                | 5770                                                        | 9.02        | (8.78-9.26)        | 5977                                                        | 9.29        | (9.06-9.53)        | 6397                                                        | 9.86        | (9.62-10.11)       | 6655                                                        | 10.18       | (9.94-10.43)       | 6733                                                        | 10.23       | (9.98-10.47)       | 6966                                                        | 10.51       | (10.27-10.76)      | 38498                                                                    | 9.86        | (9.76-9.95)        |        |            |    |
| <b>All Europe</b> | <b>18710</b>                                                | <b>4.01</b> | <b>(3.95-4.07)</b> | <b>19677</b>                                                | <b>4.09</b> | <b>(4.38-4.15)</b> | <b>21160</b>                                                | <b>4.41</b> | <b>(4.35-4.47)</b> | <b>21911</b>                                                | <b>4.55</b> | <b>(4.49-4.61)</b> | <b>22490</b>                                                | <b>4.70</b> | <b>(4.63-4.76)</b> | <b>20935</b>                                                | <b>5.08</b> | <b>(5.01-5.15)</b> | <b>124883</b>                                                            | <b>4.46</b> | <b>(4.44-4.49)</b> |        |            |    |

CI: confidence interval

**Supplementary Material S10: Broader analysis: age- and sex- standardised mortality rates for IPF broad codeset in 24 European Countries in 2013–2018**

| Country           | Standardized Mortality Rate per 100,000 Person-Years (95% CI) 2013 |                    | Standardized Mortality Rate per 100,000 Person-Years (95% CI) 2014 |                    | Standardized Mortality Rate per 100,000 Person-Years (95% CI) 2015 |                    | Standardized Mortality Rate per 100,000 Person-Years (95% CI) 2016 |                    | Standardized Mortality Rate per 100,000 Person-Years (95% CI) 2017 |                    | Standardized Mortality Rate per 100,000 Person-Years (95% CI) 2018 |                    | Overall Standardized Mortality Rate per 100,000 Person-Years (95% CI) 2013-2018 |                    | AAPC         | CI                 |
|-------------------|--------------------------------------------------------------------|--------------------|--------------------------------------------------------------------|--------------------|--------------------------------------------------------------------|--------------------|--------------------------------------------------------------------|--------------------|--------------------------------------------------------------------|--------------------|--------------------------------------------------------------------|--------------------|---------------------------------------------------------------------------------|--------------------|--------------|--------------------|
|                   | Rate                                                               | IC                 | Rate                                                               | IC                 | Rate                                                               | IC                 | Rate                                                               | IC                 | Rate                                                               | IC                 | Rate                                                               | IC                 | Rate                                                                            | IC                 |              |                    |
|                   | Austria                                                            | <b>2.20</b>        | (1.90-2.60)                                                        | <b>2.40</b>        | (2.10-2.80)                                                        | <b>2.40</b>        | (2.10-2.80)                                                        | <b>2.20</b>        | (1.90-2.50)                                                        | <b>2.30</b>        | (2.00-2.70)                                                        | <b>2.60</b>        | (2.20-2.90)                                                                     | <b>2.40</b>        |              |                    |
| Belgium           | <b>3.90</b>                                                        | (3.60-4.30)        | <b>3.50</b>                                                        | (3.10-3.90)        | <b>3.60</b>                                                        | (3.20-4.00)        | <b>4.00</b>                                                        | (3.60-4.40)        | <b>3.80</b>                                                        | (3.40-4.20)        | <b>4.00</b>                                                        | (3.60-4.40)        | <b>3.80</b>                                                                     | (3.70-4.00)        | 1.95         | (-3.54-8.01)       |
| Bulgaria          | <b>0.50</b>                                                        | (0.30-0.70)        | <b>0.40</b>                                                        | (0.30-0.60)        | <b>0.20</b>                                                        | (0.10-0.30)        | <b>0.10</b>                                                        | (0.10-0.20)        | <b>0.20</b>                                                        | (0.10-0.40)        | <b>0.40</b>                                                        | (0.20-0.50)        | <b>0.50</b>                                                                     | (0.40-0.60)        | -7.86        | (-33.42-20.99)     |
| Croatia           | <b>0.50</b>                                                        | (0.30-0.70)        | <b>0.60</b>                                                        | (0.30-0.80)        | <b>0.50</b>                                                        | (0.30-0.80)        | <b>0.60</b>                                                        | (0.40-0.90)        | <b>0.60</b>                                                        | (0.40-0.90)        | <b>0.80</b>                                                        | (0.50-1.10)        | <b>0.80</b>                                                                     | (0.70-0.90)        | 8.34         | (-4.55-25.61)      |
| Denmark           | <b>2.90</b>                                                        | (2.40-3.40)        | <b>3.30</b>                                                        | (2.80-3.80)        | <b>3.30</b>                                                        | (2.80-3.80)        | <b>3.90</b>                                                        | (3.30-4.40)        | <b>3.90</b>                                                        | (3.30-4.40)        | <b>4.70</b>                                                        | (4.10-5.30)        | <b>3.70</b>                                                                     | (3.50-4.00)        | 12.94*       | (3.92-23.25)       |
| Estonia           | <b>N/A</b>                                                         | N/A                | <b>0.60</b>                                                        | (0.20-1.10)        | <b>0.90</b>                                                        | (0.30-1.40)        | <b>0.40</b>                                                        | (0.10-0.80)        | <b>0.30</b>                                                        | (0.00-0.70)        | <b>1.90</b>                                                        | (1.10-2.80)        | <b>2.00</b>                                                                     | (1.30-2.70)        | 1.54         | (-0.82-4.11)       |
| Finland           | <b>5.70</b>                                                        | (5.10-6.40)        | <b>5.50</b>                                                        | (4.90-6.20)        | <b>5.50</b>                                                        | (4.90-6.20)        | <b>6.80</b>                                                        | (6.10-7.50)        | <b>5.80</b>                                                        | (5.60-6.40)        | <b>6.20</b>                                                        | (5.60-6.90)        | <b>6.00</b>                                                                     | (5.70-6.30)        | 6.05         | (-5.59-20.17)      |
| France            | <b>3.00</b>                                                        | (2.90-3.20)        | <b>3.10</b>                                                        | (3.00-3.30)        | <b>3.30</b>                                                        | (3.10-3.40)        | <b>3.30</b>                                                        | (3.10-3.40)        | <b>3.20</b>                                                        | (3.10-3.40)        | <b>N/A</b>                                                         | N/A                | <b>3.20</b>                                                                     | (3.10-3.30)        | 1.90         | (-2.31-6.22)       |
| Germany           | <b>3.60</b>                                                        | (3.50-3.80)        | <b>3.60</b>                                                        | (3.50-3.70)        | <b>3.70</b>                                                        | (3.60-3.80)        | <b>3.80</b>                                                        | (3.70-3.90)        | <b>3.90</b>                                                        | (3.80-4.00)        | <b>3.90</b>                                                        | (3.70-4.00)        | <b>3.80</b>                                                                     | (3.70-3.80)        | 1.99*        | (0.94-3.11)        |
| Greece            | <b>N/A</b>                                                         | N/A                | <b>3.60</b>                                                        | (3.30-4.00)        | <b>4.10</b>                                                        | (3.70-4.40)        | <b>3.70</b>                                                        | (3.30-4.00)        | <b>3.90</b>                                                        | (3.60-4.30)        | <b>3.60</b>                                                        | (3.20-3.90)        | <b>3.80</b>                                                                     | (3.60-3.90)        | -0.50        | (-6.66-6.09)       |
| Hungary           | <b>2.20</b>                                                        | (1.90-2.50)        | <b>2.00</b>                                                        | (1.70-2.30)        | <b>2.40</b>                                                        | (2.10-2.70)        | <b>2.30</b>                                                        | (2.00-2.70)        | <b>2.40</b>                                                        | (2.00-2.70)        | <b>2.70</b>                                                        | (2.30-3.00)        | <b>2.30</b>                                                                     | (2.20-2.50)        | 4.21         | (-1.03-10.13)      |
| Ireland           | <b>11.30</b>                                                       | (10.00-12.60)      | <b>12.60</b>                                                       | (11.20-13.90)      | <b>11.90</b>                                                       | (10.60-13.20)      | <b>12.40</b>                                                       | (11.10-13.60)      | <b>13.50</b>                                                       | (12.20-14.80)      | <b>13.00</b>                                                       | (11.70-14.30)      | <b>12.50</b>                                                                    | (12.00-13.10)      | 13.43        | (-1.34-10.13)      |
| Italy             | <b>3.50</b>                                                        | (3.40-3.70)        | <b>3.50</b>                                                        | (3.30-3.60)        | <b>3.60</b>                                                        | (3.50-3.80)        | <b>3.50</b>                                                        | (3.40-3.70)        | <b>3.80</b>                                                        | (3.70-4.00)        | <b>4.00</b>                                                        | (3.90-4.20)        | <b>3.70</b>                                                                     | (3.60-3.70)        | 2.91*        | (0.83-5.15)        |
| Luxembourg        | <b>2.90</b>                                                        | (2.00-4.60)        | <b>3.50</b>                                                        | (1.60-5.40)        | <b>2.50</b>                                                        | (1.00-4.10)        | <b>3.00</b>                                                        | (1.30-4.70)        | <b>2.90</b>                                                        | (1.20-4.50)        | <b>3.40</b>                                                        | (1.70-5.20)        | <b>4.40</b>                                                                     | (3.30-5.60)        | 1.49         | (-8.99-13.49)      |
| Latvia            | <b>0.70</b>                                                        | (0.30-1.00)        | <b>0.50</b>                                                        | (0.10-0.90)        | <b>0.90</b>                                                        | (0.40-1.30)        | <b>0.30</b>                                                        | (0.00-0.50)        | <b>0.50</b>                                                        | (0.20-0.90)        | <b>0.70</b>                                                        | (0.30-1.10)        | <b>1.30</b>                                                                     | (0.90-1.70)        | -0.30        | (-47.06-78.74)     |
| Netherlands       | <b>4.00</b>                                                        | (3.60-4.30)        | <b>3.90</b>                                                        | (3.60-4.20)        | <b>4.40</b>                                                        | (4.10-4.80)        | <b>4.30</b>                                                        | (4.00-4.60)        | <b>4.20</b>                                                        | (3.80-4.50)        | <b>4.40</b>                                                        | (4.00-4.70)        | <b>4.20</b>                                                                     | (4.10-4.30)        | 2.07         | (-1.77-6.28)       |
| Poland            | <b>1.40</b>                                                        | (1.20-1.50)        | <b>1.40</b>                                                        | (1.30-1.50)        | <b>1.40</b>                                                        | (1.30-1.50)        | <b>1.50</b>                                                        | (1.40-1.70)        | <b>1.70</b>                                                        | (1.50-1.80)        | <b>1.50</b>                                                        | (1.30-1.60)        | <b>1.50</b>                                                                     | (.40-1.50)         | 2.61         | (-0.01-5.31)       |
| Portugal          | <b>3.50</b>                                                        | (3.10-3.80)        | <b>3.90</b>                                                        | (3.60-4.30)        | <b>4.10</b>                                                        | (3.70-4.40)        | <b>4.40</b>                                                        | (4.00-4.80)        | <b>3.80</b>                                                        | (3.40-4.10)        | <b>3.70</b>                                                        | (3.30-4.00)        | <b>3.90</b>                                                                     | (3.70-4.10)        | 0.54         | (-6.42-8.12)       |
| Romania           | <b>1.30</b>                                                        | (1.10-1.50)        | <b>1.10</b>                                                        | (1.00-1.30)        | <b>1.50</b>                                                        | (1.30-1.70)        | <b>1.70</b>                                                        | (1.50-1.90)        | <b>1.40</b>                                                        | (1.20-1.60)        | <b>1.60</b>                                                        | (1.40-1.80)        | <b>1.40</b>                                                                     | (1.40-1.50)        | 4.13         | (-8.79-21.55)      |
| Slovenia          | <b>2.70</b>                                                        | (1.90-3.50)        | <b>3.20</b>                                                        | (2.40-4.10)        | <b>2.90</b>                                                        | (2.10-3.70)        | <b>3.30</b>                                                        | (2.50-4.20)        | <b>3.10</b>                                                        | (2.30-3.90)        | <b>4.00</b>                                                        | (3.10-4.90)        | <b>3.50</b>                                                                     | (3.10-3.90)        | 11.00*       | (0.17-23.60)       |
| Slovakia          | <b>2.10</b>                                                        | (1.60-2.50)        | <b>2.40</b>                                                        | (1.90-2.90)        | <b>1.90</b>                                                        | (1.50-2.30)        | <b>2.50</b>                                                        | (2.00-3.00)        | <b>1.90</b>                                                        | (1.40-2.30)        | <b>2.30</b>                                                        | (1.80-2.70)        | <b>2.30</b>                                                                     | (2.10-2.50)        | 1.29         | (-4.71-7.69)       |
| Spain             | <b>5.30</b>                                                        | (5.10-5.50)        | <b>5.40</b>                                                        | (5.20-5.60)        | <b>5.70</b>                                                        | (5.50-5.90)        | <b>5.70</b>                                                        | (5.50-5.90)        | <b>5.80</b>                                                        | (5.60-6.00)        | <b>5.60</b>                                                        | (5.40-5.80)        | <b>5.60</b>                                                                     | (5.50-5.70)        | 1.54         | (-0.83-4.12)       |
| Sweden            | <b>4.80</b>                                                        | (4.30-5.20)        | <b>4.80</b>                                                        | (4.40-5.30)        | <b>5.60</b>                                                        | (5.10-6.10)        | <b>5.40</b>                                                        | (5.00-5.90)        | <b>5.50</b>                                                        | (5.10-6.00)        | <b>5.50</b>                                                        | (5.00-5.90)        | <b>5.30</b>                                                                     | (5.10-5.50)        | 2.94         | (-1.20-7.45)       |
| UK                | <b>10.60</b>                                                       | (10.30-10.80)      | <b>10.70</b>                                                       | (10.40-11.00)      | <b>11.20</b>                                                       | (11.00-11.50)      | <b>11.50</b>                                                       | (11.20-11.70)      | <b>11.40</b>                                                       | (11.10-11.60)      | <b>11.50</b>                                                       | (11.20-11.70)      | <b>11.10</b>                                                                    | (11.00-11.30)      | 1.93*        | (0.98-2.88)        |
| <b>All Europe</b> | <b>4.40</b>                                                        | <b>(4.30-4.40)</b> | <b>4.40</b>                                                        | <b>(4.30-4.40)</b> | <b>4.60</b>                                                        | <b>(4.50-4.70)</b> | <b>4.70</b>                                                        | <b>(4.60-4.70)</b> | <b>4.70</b>                                                        | <b>(4.60-4.80)</b> | <b>4.90</b>                                                        | <b>(4.90-5.00)</b> | <b>4.60</b>                                                                     | <b>(4.60-4.60)</b> | <b>3.02*</b> | <b>(2.17-3.91)</b> |

AAPC: average annual percent change; CI: confidence interval; \*: statistically significant.

**Supplementary Material S11:** Broader analysis: overall row deaths, age- and sex- standardised mortality rates for IPF broad codeset ("J84") in Europe in 2013–2018, age- and sex- stratum data

|                          | Standardised Mortality Rate per 100,000 Person-Years (95% CI) <b>2013</b> |              |               | Standardised Mortality Rate per 100,000 Person-Years (95% CI) <b>2014</b> |              |               | Standardised Mortality Rate per 100,000 Person-Years (95% CI) <b>2015</b> |              |               | Standardised Mortality Rate per 100,000 Person-Years (95% CI) <b>2016</b> |              |               |
|--------------------------|---------------------------------------------------------------------------|--------------|---------------|---------------------------------------------------------------------------|--------------|---------------|---------------------------------------------------------------------------|--------------|---------------|---------------------------------------------------------------------------|--------------|---------------|
|                          | Row deaths                                                                | Rate         | IC            | Row deaths                                                                | Rate         | IC            | Row deaths                                                                | Rate         | IC            | Row deaths                                                                | Rate         | IC            |
| <i>Total population</i>  | 16148                                                                     | <b>4.40</b>  | (4.30-4.40)   | 16877                                                                     | <b>4.40</b>  | (4.30-4.40)   | 17885                                                                     | <b>4.60</b>  | (4.50-4.70)   | 18331                                                                     | <b>4.70</b>  | (4.60-4.70)   |
| <i>Sex</i>               |                                                                           |              |               |                                                                           |              |               |                                                                           |              |               |                                                                           |              |               |
| Female                   | 6484                                                                      | <b>3.40</b>  | (3.30-3.50)   | 6662                                                                      | <b>3.40</b>  | (3.30-3.50)   | 7060                                                                      | <b>3.60</b>  | (3.50-3.70)   | 7220                                                                      | <b>3.70</b>  | (3.70-3.80)   |
| Male                     | 9664                                                                      | <b>5.30</b>  | (5.20-5.40)   | 10215                                                                     | <b>5.30</b>  | (5.20-5.40)   | 10825                                                                     | <b>5.60</b>  | (5.50-5.70)   | 11111                                                                     | <b>5.60</b>  | (5.50-5.70)   |
| <i>Age group (years)</i> |                                                                           |              |               |                                                                           |              |               |                                                                           |              |               |                                                                           |              |               |
| 0-54                     | 386                                                                       | <b>0.20</b>  | (0.10-0.20)   | 332                                                                       | <b>0.10</b>  | (0.10-0.10)   | 339                                                                       | <b>0.20</b>  | (0.10-0.20)   | 382                                                                       | <b>0.20</b>  | (0.20-0.20)   |
| 55-59                    | 352                                                                       | <b>1.50</b>  | (1.30-1.60)   | 340                                                                       | <b>1.40</b>  | (1.30-1.50)   | 387                                                                       | <b>1.60</b>  | (1.40-1.70)   | 359                                                                       | <b>1.50</b>  | (1.30-1.60)   |
| 60-64                    | 759                                                                       | <b>3.20</b>  | (3.00-3.40)   | 752                                                                       | <b>3.20</b>  | (3.00-3.40)   | 739                                                                       | <b>3.20</b>  | (3.00-3.40)   | 791                                                                       | <b>3.30</b>  | (3.10-3.50)   |
| 65-69                    | 1268                                                                      | <b>6.20</b>  | (5.90-6.50)   | 1411                                                                      | <b>6.60</b>  | (6.30-6.90)   | 1401                                                                      | <b>6.40</b>  | (6.10-6.70)   | 1472                                                                      | <b>6.60</b>  | (6.30-6.90)   |
| 70-74                    | 2214                                                                      | <b>12.30</b> | (11.80-12.80) | 2336                                                                      | <b>13.00</b> | (12.60-13.50) | 2223                                                                      | <b>12.50</b> | (12.00-13.00) | 2257                                                                      | <b>13.00</b> | (12.50-13.50) |
| 75-79                    | 3270                                                                      | <b>21.50</b> | (20.90-22.20) | 3494                                                                      | <b>21.90</b> | (21.20-22.60) | 3710                                                                      | <b>23.40</b> | (22.70-24.00) | 3767                                                                      | <b>23.30</b> | (22.60-24.00) |
| 80-84                    | 3595                                                                      | <b>32.40</b> | (31.40-33.40) | 3724                                                                      | <b>32.00</b> | (31.00-33.00) | 4119                                                                      | <b>35.60</b> | (34.60-36.60) | 4162                                                                      | <b>36.20</b> | (35.20-37.20) |
| > 85                     | 4304                                                                      | <b>44.80</b> | (43.60-46.10) | 4488                                                                      | <b>43.60</b> | (42.40-44.80) | 4967                                                                      | <b>47.00</b> | (45.80-48.20) | 5141                                                                      | <b>47.90</b> | (46.70-49.10) |

→ continue

|                          | Standardised Mortality Rate per 100,000 Person-Years (95% CI) <b>2017</b> |              |               | Standardised Mortality Rate per 100,000 Person-Years (95% CI) <b>2018</b> |              |               | Overall Standardised Mortality Rate per 100,000 Person-Years (95% CI) <b>2013-2018</b> |              |               | AAPC  | CI           |
|--------------------------|---------------------------------------------------------------------------|--------------|---------------|---------------------------------------------------------------------------|--------------|---------------|----------------------------------------------------------------------------------------|--------------|---------------|-------|--------------|
|                          | Row deaths                                                                | Rate         | IC            | Row deaths                                                                | Rate         | IC            | Row deaths                                                                             | Rate         | IC            |       |              |
| <i>Total population</i>  | 18500                                                                     | <b>4.70</b>  | (4.60-4.80)   | 17026                                                                     | <b>4.90</b>  | (4.90-5.00)   | 104767                                                                                 | <b>4.60</b>  | (4.60-4.60)   | 3.02* | 2.17-3.91)   |
| <i>Sex</i>               |                                                                           |              |               |                                                                           |              |               |                                                                                        |              |               |       |              |
| Female                   | 7139                                                                      | <b>3.70</b>  | (3.60-3.70)   | 6418                                                                      | <b>3.80</b>  | (3.80-3.90)   | 40983                                                                                  | <b>3.60</b>  | (3.60-3.60)   | 2.81* | (1.56-4.11)  |
| Male                     | 11361                                                                     | <b>5.70</b>  | (5.60-5.80)   | 10608                                                                     | <b>6.10</b>  | (6.00-6.20)   | 63784                                                                                  | <b>5.60</b>  | (5.60-5.70)   | 2.69* | (1.28-4.18)  |
| <i>Age group (years)</i> |                                                                           |              |               |                                                                           |              |               |                                                                                        |              |               |       |              |
| 0-54                     | 320                                                                       | <b>0.10</b>  | (0.10-0.20)   | 319                                                                       | <b>0.20</b>  | (0.20-0.20)   | 2078                                                                                   | <b>0.20</b>  | (0.20-0.20)   | 2.32  | (-3.39-8.37) |
| 55-59                    | 345                                                                       | <b>1.50</b>  | (1.40-1.70)   | 294                                                                       | <b>1.40</b>  | (1.30-1.60)   | 2077                                                                                   | <b>1.50</b>  | (1.40-1.50)   | 0.32  | (-4.56-5.51) |
| 60-64                    | 753                                                                       | <b>3.30</b>  | (3.10-3.50)   | 687                                                                       | <b>3.30</b>  | (3.10-3.50)   | 4481                                                                                   | <b>3.20</b>  | (3.20-3.30)   | 1.27  | (-0.18-2.74) |
| 65-69                    | 1406                                                                      | <b>6.20</b>  | (5.90-6.40)   | 1253                                                                      | <b>6.50</b>  | (6.20-6.80)   | 8211                                                                                   | <b>6.40</b>  | (6.30-6.50)   | 0.06  | (-2.23-2.47) |
| 70-74                    | 2186                                                                      | <b>12.40</b> | (12.00-12.90) | 2310                                                                      | <b>14.30</b> | (13.80-14.80) | 13526                                                                                  | <b>12.90</b> | (12.70-13.10) | 1.98  | (-1.74-5.86) |
| 75-79                    | 3718                                                                      | <b>23.40</b> | (22.70-24.10) | 3374                                                                      | <b>24.40</b> | (23.70-25.20) | 21333                                                                                  | <b>23.00</b> | (22.70-23.30) | 2.36* | (1.18-3.55)  |
| 80-84                    | 4267                                                                      | <b>36.30</b> | (35.40-37.30) | 3889                                                                      | <b>37.70</b> | (36.60-38.80) | 23756                                                                                  | <b>35.10</b> | (34.60-35.50) | 3.31* | (1.47-5.29)  |
| > 85                     | 5505                                                                      | <b>50.20</b> | (49.00-51.40) | 4900                                                                      | <b>52.10</b> | (50.80-53.40) | 29305                                                                                  | <b>47.70</b> | (47.20-48.20) | 3.50* | (2.45-4.60)  |

AAPC: average annual percent change; CI: confidence interval; \*: statistically significant

**Supplementary Material S12: crude and age- and sex- standardised IPF-CS mortality rates in 24 European Countries in 2019-2020**

| Country           | Narrow codeset band                                    |             |                                                               |              |                    |                                                        |             |                                                               |             |                    | Broad codeset band                                     |              |                                                               |              |                    |                                                        |              |                                                               |             |                    |
|-------------------|--------------------------------------------------------|-------------|---------------------------------------------------------------|--------------|--------------------|--------------------------------------------------------|-------------|---------------------------------------------------------------|-------------|--------------------|--------------------------------------------------------|--------------|---------------------------------------------------------------|--------------|--------------------|--------------------------------------------------------|--------------|---------------------------------------------------------------|-------------|--------------------|
|                   | 2019                                                   |             |                                                               |              |                    | 2020                                                   |             |                                                               |             |                    | 2019                                                   |              |                                                               |              |                    | 2020                                                   |              |                                                               |             |                    |
|                   | Crude Mortality Rate per 100,000 Person-Years (95% CI) |             | Standardized Mortality Rate per 100,000 Person-Years (95% CI) |              |                    | Crude Mortality Rate per 100,000 Person-Years (95% CI) |             | Standardized Mortality Rate per 100,000 Person-Years (95% CI) |             |                    | Crude Mortality Rate per 100,000 Person-Years (95% CI) |              | Standardized Mortality Rate per 100,000 Person-Years (95% CI) |              |                    | Crude Mortality Rate per 100,000 Person-Years (95% CI) |              | Standardized Mortality Rate per 100,000 Person-Years (95% CI) |             |                    |
| Deaths            | Crude rate                                             | IC          | Rate                                                          | IC           | Deaths             | Crude rate                                             | IC          | Rate                                                          | IC          | Deaths             | Crude rate                                             | IC           | Rate                                                          | IC           | Deaths             | Crude rate                                             | IC           | Rate                                                          | IC          |                    |
| Austria           | 166                                                    | <b>1.95</b> | (1.67-2.27)                                                   | <b>2.00</b>  | (1.70-2.30)        | 100                                                    | <b>1.17</b> | (0.96-1.42)                                                   | <b>1.10</b> | (0.90-1.40)        | 192                                                    | <b>2.25</b>  | (1.96-2.60)                                                   | <b>2.30</b>  | (1.90-2.60)        | 125                                                    | <b>1.46</b>  | (1.23-1.74)                                                   | <b>1.40</b> | (1.20-1.70)        |
| Belgium           | 389                                                    | <b>3.40</b> | (3.07-3.75)                                                   | <b>3.50</b>  | (3.10-3.80)        | 313                                                    | <b>4.13</b> | (3.70-4.62)                                                   | <b>2.70</b> | (2.40-3.00)        | 475                                                    | <b>4.15</b>  | (3.79-4.54)                                                   | <b>4.30</b>  | (3.90-4.70)        | 424                                                    | <b>5.60</b>  | (5.09-6.16)                                                   | <b>3.70</b> | (3.30-4.10)        |
| Bulgaria          | 53                                                     | <b>0.76</b> | (0.58-0.99)                                                   | <b>0.80</b>  | (0.50-1.00)        | 40                                                     | <b>0.93</b> | (0.68-1.72)                                                   | <b>0.60</b> | (0.40-0.80)        | 55                                                     | <b>0.79</b>  | (0.60-1.02)                                                   | <b>0.80</b>  | (0.60-1.00)        | 48                                                     | <b>1.12</b>  | (0.84-1.49)                                                   | <b>0.70</b> | (0.50-0.90)        |
| Croatia           | 19                                                     | <b>1.67</b> | (1.07-2.62)                                                   | <b>0.50</b>  | (0.30-0.70)        | 13                                                     | <b>0.41</b> | (0.24-0.70)                                                   | <b>0.30</b> | (0.10-0.50)        | 24                                                     | <b>2.11</b>  | (1.42-3.15)                                                   | <b>0.60</b>  | (0.40-0.80)        | 21                                                     | <b>0.66</b>  | (0.43-1.01)                                                   | <b>0.50</b> | (0.30-0.70)        |
| Denmark           | 128                                                    | <b>3.31</b> | (2.79-3.94)                                                   | <b>2.40</b>  | (2.00-2.80)        | 134                                                    | <b>3.79</b> | (3.20-4.49)                                                   | <b>2.40</b> | (2.00-2.80)        | 239                                                    | <b>6.18</b>  | (5.45-7.02)                                                   | <b>4.40</b>  | (3.90-5.00)        | 234                                                    | <b>6.62</b>  | (5.83-7.53)                                                   | <b>4.20</b> | (3.70-4.80)        |
| Estonia           | 15                                                     | <b>2.63</b> | (1.58-4.35)                                                   | <b>1.30</b>  | (0.60-2.00)        | 20                                                     | <b>2.89</b> | (1.87-4.48)                                                   | <b>1.70</b> | (0.90-2.40)        | 18                                                     | <b>13.04</b> | (8.21-20.69)                                                  | <b>1.60</b>  | (0.90-2.40)        | 27                                                     | <b>10.41</b> | (7.14-15.18)                                                  | <b>2.20</b> | (1.40-3.10)        |
| Finland           | 339                                                    | <b>4.04</b> | (3.87-4.23)                                                   | <b>6.10</b>  | (5.40-6.70)        | 264                                                    | <b>4.94</b> | (4.38-5.58)                                                   | <b>4.50</b> | (4.00-5.10)        | 382                                                    | <b>10.13</b> | (9.17-11.20)                                                  | <b>6.90</b>  | (6.20-7.60)        | 306                                                    | <b>8.49</b>  | (7.59-9.50)                                                   | <b>5.30</b> | (4.70-5.90)        |
| France            | N/A                                                    | <b>N/A</b>  | N/A                                                           | <b>N/A</b>   | N/A                | 1760                                                   | <b>2.61</b> | (2.50-2.74)                                                   | <b>2.50</b> | (2.40-2.60)        | N/A                                                    | <b>N/A</b>   | N/A                                                           | <b>N/A</b>   | N/A                | 2098                                                   | <b>3.12</b>  | (2.99-3.25)                                                   | <b>3.00</b> | (2.90-3.10)        |
| Germany           | 3334                                                   | <b>4.02</b> | (3.88-4.16)                                                   | <b>3.60</b>  | (3.40-3.70)        | 3170                                                   | <b>3.81</b> | 3.68-3.95)                                                    | <b>3.30</b> | (3.20-3.40)        | 3735                                                   | <b>4.50</b>  | (4.36-4.64)                                                   | <b>4.00</b>  | (3.90-4.10)        | 3625                                                   | <b>4.36</b>  | (4.22-4.50)                                                   | <b>3.80</b> | (3.70-3.90)        |
| Greece            | 440                                                    | <b>4.25</b> | (3.87-4.67)                                                   | <b>3.60</b>  | (3.20-3.90)        | 372                                                    | <b>3.47</b> | (3.14-3.84)                                                   | <b>3.00</b> | (2.60-3.30)        | 506                                                    | <b>4.89</b>  | (4.85-5.34)                                                   | <b>4.10</b>  | (3.70-4.50)        | 424                                                    | <b>3.96</b>  | (3.60-4.35)                                                   | <b>3.40</b> | (3.10-3.70)        |
| Hungary           | 192                                                    | <b>1.96</b> | (1.71-2.26)                                                   | <b>2.10</b>  | (1.80-2.50)        | 170                                                    | <b>1.74</b> | (1.50-2.02)                                                   | <b>1.90</b> | (1.60-2.20)        | 215                                                    | <b>2.20</b>  | (1.93-2.51)                                                   | <b>2.40</b>  | (2.10-2.70)        | 189                                                    | <b>1.93</b>  | (1.68-2.23)                                                   | <b>2.20</b> | (1.80-2.50)        |
| Ireland           | 408                                                    | <b>8.57</b> | (7.78-9.44)                                                   | <b>12.60</b> | (11.40-13.80)      | 308                                                    | <b>9.89</b> | (8.84-11.06)                                                  | <b>9.10</b> | (8.00-10.10)       | 471                                                    | <b>9.89</b>  | (9.04-10.83)                                                  | <b>14.50</b> | (13.20-15.80)      | 378                                                    | <b>12.14</b> | (10.97-13.42)                                                 | <b>0.10</b> | (9.90-12.20)       |
| Italy             | 2605                                                   | <b>4.35</b> | (4.19-4.52)                                                   | <b>3.60</b>  | (3.50-3.70)        | 2238                                                   | <b>3.75</b> | (3.60-3.91)                                                   | <b>3.00</b> | (2.90-3.20)        | 2920                                                   | <b>4.88</b>  | (4.71-5.06)                                                   | <b>4.10</b>  | (3.90-4.20)        | 6180                                                   | <b>10.36</b> | (10.11-10.62)                                                 | <b>8.40</b> | (8.20-8.60)        |
| Luxembourg        | 17                                                     | <b>5.88</b> | (3.66-9.46)                                                   | <b>3.70</b>  | (1.90-5.50)        | 23                                                     | <b>4.12</b> | (2.74-6.20)                                                   | <b>4.50</b> | (2.60-6.30)        | 14                                                     | <b>0.40</b>  | (12.08-34.45)                                                 | <b>3.30</b>  | (1.60-5.00)        | 19                                                     | <b>8.93</b>  | (12.08-29.68)                                                 | <b>4.10</b> | (2.30-6.00)        |
| Latvia            | 14                                                     | <b>1.44</b> | (0.85-2.43)                                                   | <b>0.80</b>  | (0.40-1.20)        | 10                                                     | <b>3.94</b> | (2.12-7.32)                                                   | <b>0.60</b> | (0.20-1.00)        | 14                                                     | <b>3.99</b>  | (2.36-6.74)                                                   | <b>0.80</b>  | (.40-1.30)         | 12                                                     | <b>4.73</b>  | (2.68-8.32)                                                   | <b>0.70</b> | (0.30-1.10)        |
| Netherlands       | 566                                                    | <b>3.28</b> | (3.02-3.56)                                                   | <b>3.50</b>  | (3.20-3.80)        | 487                                                    | <b>3.01</b> | (2.76-3.29)                                                   | <b>2.90</b> | (2.70-3.20)        | 728                                                    | <b>4.21</b>  | (3.92-4.53)                                                   | <b>4.60</b>  | (4.20-4.90)        | 610                                                    | <b>3.76</b>  | (3.49-4.09)                                                   | <b>3.70</b> | (3.40-4.00)        |
| Poland            | 384                                                    | <b>1.01</b> | (0.92-1.12)                                                   | <b>1.20</b>  | (1.10-1.30)        | 397                                                    | <b>1.04</b> | (0.95-1.15)                                                   | <b>1.20</b> | (1.10-1.40)        | 587                                                    | <b>1.55</b>  | (1.43-1.68)                                                   | <b>1.80</b>  | (.170-2.00)        | 600                                                    | <b>1.58</b>  | (1.46-1.71)                                                   | <b>1.90</b> | (1.70-2.00)        |
| Portugal          | 325                                                    | <b>3.16</b> | (2.84-3.53)                                                   | <b>2.90</b>  | (2.60-3.20)        | 292                                                    | <b>2.83</b> | (2.53-3.18)                                                   | <b>2.50</b> | (2.20-2.80)        | 428                                                    | <b>4.16</b>  | (3.79-4.58)                                                   | <b>3.80</b>  | (3.50-4.20)        | 365                                                    | <b>3.54</b>  | (3.20-3.93)                                                   | <b>3.20</b> | (2.90-3.50)        |
| Romania           | 129                                                    | <b>0.66</b> | (0.56-0.79)                                                   | <b>0.70</b>  | (0.60-0.90)        | 136                                                    | <b>0.70</b> | (0.60-0.83)                                                   | <b>0.80</b> | (0.60-0.90)        | 265                                                    | <b>1.37</b>  | (1.21-1.54)                                                   | <b>1.50</b>  | (1.30-1.70)        | 439                                                    | <b>2.71</b>  | (2.07-2.49)                                                   | <b>2.50</b> | (2.30-2.70)        |
| Slovenia          | 74                                                     | <b>5.42</b> | (4.31-6.80)                                                   | <b>3.70</b>  | (2.80-4.50)        | 43                                                     | <b>3.50</b> | (2.60-4.73)                                                   | <b>2.10</b> | (1.50-2.80)        | 79                                                     | <b>11.16</b> | (8.95-13.91)                                                  | <b>4.00</b>  | (3.10-4.80)        | 43                                                     | <b>7.51</b>  | (5.58-10.14)                                                  | <b>2.20</b> | (1.50-2.80)        |
| Slovakia          | 55                                                     | <b>1.04</b> | (0.80-1.36)                                                   | <b>1.30</b>  | (1.00-1.70)        | 53                                                     | <b>1.04</b> | (0.80-1.36)                                                   | <b>1.20</b> | (0.90-1.60)        | 90                                                     | <b>1.71</b>  | (1.39-2.10)                                                   | <b>2.10</b>  | (1.60-2.50)        | 88                                                     | <b>1.73</b>  | (1.40-2.13)                                                   | <b>2.10</b> | (1.60-2.50)        |
| Spain             | 1898                                                   | <b>8.99</b> | (8.08-10.00)                                                  | <b>3.90</b>  | (3.70-4.10)        | 1689                                                   | <b>3.57</b> | (3.40-3.74)                                                   | <b>3.40</b> | (3.30-3.60)        | 2542                                                   | <b>5.42</b>  | (5.21-5.63)                                                   | <b>5.20</b>  | (5.00-5.40)        | 2367                                                   | <b>5.00</b>  | (4.80-5.21)                                                   | <b>4.80</b> | (4.60-5.00)        |
| Sweden            | 560                                                    | <b>5.47</b> | (5.04-5.95)                                                   | <b>5.50</b>  | (5.10-6.00)        | 478                                                    | <b>4.63</b> | (4.23-5.06)                                                   | <b>4.60</b> | (4.20-5.00)        | 622                                                    | <b>6.08</b>  | (6.20-6.58)                                                   | <b>6.20</b>  | (5.70-6.70)        | 520                                                    | <b>5.03</b>  | (4.62-5.49)                                                   | <b>5.00</b> | (4.60-5.50)        |
| UK                | N/A                                                    | <b>N/A</b>  | N/A                                                           | <b>N/A</b>   | N/A                | N/A                                                    | <b>N/A</b>  | N/A                                                           | <b>N/A</b>  | N/A                | N/A                                                    | <b>N/A</b>   | N/A                                                           | <b>N/A</b>   | N/A                | <b>N/A</b>                                             | N/A          | <b>N/A</b>                                                    | N/A         |                    |
| <b>All Europe</b> | <b>14129</b>                                           | <b>3.42</b> | <b>(3.36-3.48)</b>                                            | <b>3.30</b>  | <b>(3.20-3.30)</b> | <b>14530</b>                                           | <b>3.01</b> | <b>(2.96-3.06)</b>                                            | <b>2.80</b> | <b>(2.80-2.80)</b> | <b>16620</b>                                           | <b>4.15</b>  | <b>(4.08-4.22)</b>                                            | <b>3.90</b>  | <b>(3.90-4.00)</b> | <b>21162</b>                                           | <b>4.65</b>  | <b>(4.58-4.71)</b>                                            | <b>4.2</b>  | <b>(4.20-4.40)</b> |

IC: confidence interval

**Supplementary Material S13:** annual point prevalence rate for each European Country along with 95% CI in 2013-2018 (GDB extracted data). Prevalence rates are reported per 100,000 people.

| Country           | 2013            |        |        | 2014            |        |        | 2015            |        |        | 2016            |        |        | 2017            |        |        | 2018            |        |        |
|-------------------|-----------------|--------|--------|-----------------|--------|--------|-----------------|--------|--------|-----------------|--------|--------|-----------------|--------|--------|-----------------|--------|--------|
|                   | Prevalence rate | 95% CI |        | Prevalence rate | 95% CI |        | Prevalence rate | 95% CI |        | Prevalence rate | 95% CI |        | Prevalence rate | 95% CI |        | Prevalence rate | 95% CI |        |
|                   |                 | UCI    | LCI    |                 | UCI    | LCI    |                 | UCI    | LCI    |                 | UCI    | LCI    |                 | UCI    | LCI    |                 | UCI    | LCI    |
| Austria           | <b>94.40</b>    | 107.72 | 83.07  | <b>92.68</b>    | 105.73 | 81.57  | <b>92.33</b>    | 105.35 | 81.14  | <b>96.51</b>    | 109.62 | 84.20  | <b>100.71</b>   | 114.97 | 86.62  | <b>97.05</b>    | 111.37 | 84.06  |
| Belgium           | <b>91.06</b>    | 101.51 | 80.39  | <b>90.26</b>    | 100.96 | 79.74  | <b>90.37</b>    | 101.31 | 79.99  | <b>92.86</b>    | 104.19 | 81.40  | <b>95.37</b>    | 108.02 | 82.31  | <b>92.99</b>    | 104.98 | 81.00  |
| Bulgaria          | <b>57.91</b>    | 70.48  | 47.19  | <b>58.60</b>    | 71.19  | 47.89  | <b>59.45</b>    | 72.40  | 48.64  | <b>63.12</b>    | 76.88  | 51.44  | <b>66.79</b>    | 81.48  | 54.20  | <b>67.62</b>    | 83.02  | 54.79  |
| Croatia           | <b>86.07</b>    | 100.01 | 73.46  | <b>85.20</b>    | 99.05  | 72.29  | <b>85.03</b>    | 99.22  | 72.06  | <b>90.43</b>    | 105.85 | 76.01  | <b>95.94</b>    | 113.17 | 79.76  | <b>94.46</b>    | 111.59 | 78.47  |
| Denmark           | <b>82.44</b>    | 90.63  | 74.45  | <b>82.05</b>    | 90.42  | 73.87  | <b>82.05</b>    | 90.87  | 73.43  | <b>82.00</b>    | 91.44  | 72.88  | <b>82.26</b>    | 92.78  | 72.65  | <b>83.33</b>    | 93.33  | 73.52  |
| Estonia           | <b>65.07</b>    | 76.12  | 55.43  | <b>65.52</b>    | 76.91  | 55.74  | <b>66.08</b>    | 77.89  | 56.16  | <b>67.57</b>    | 79.43  | 56.92  | <b>68.98</b>    | 81.94  | 57.85  | <b>69.46</b>    | 82.27  | 58.12  |
| Finland           | <b>119.09</b>   | 132.57 | 105.80 | <b>119.73</b>   | 133.74 | 106.41 | <b>121.11</b>   | 135.83 | 107.18 | <b>124.61</b>   | 140.10 | 109.49 | <b>127.46</b>   | 145.07 | 110.70 | <b>125.66</b>   | 142.14 | 109.38 |
| France            | <b>71.63</b>    | 80.20  | 63.59  | <b>72.47</b>    | 81.36  | 64.29  | <b>73.33</b>    | 82.79  | 65.01  | <b>74.31</b>    | 83.98  | 65.37  | <b>75.33</b>    | 85.86  | 65.54  | <b>76.28</b>    | 86.86  | 66.35  |
| Germany           | <b>99.15</b>    | 109.93 | 88.43  | <b>100.61</b>   | 111.42 | 89.50  | <b>101.72</b>   | 112.94 | 90.18  | <b>103.67</b>   | 115.43 | 92.25  | <b>105.03</b>   | 117.98 | 92.99  | <b>101.15</b>   | 114.32 | 88.99  |
| Greece            | <b>68.09</b>    | 76.52  | 59.79  | <b>70.63</b>    | 79.26  | 61.96  | <b>73.06</b>    | 82.51  | 63.96  | <b>75.63</b>    | 85.49  | 65.76  | <b>77.41</b>    | 88.83  | 66.77  | <b>78.03</b>    | 89.36  | 67.26  |
| Hungary           | <b>81.04</b>    | 93.31  | 70.74  | <b>82.19</b>    | 94.70  | 71.66  | <b>83.52</b>    | 96.16  | 73.11  | <b>86.04</b>    | 99.26  | 74.55  | <b>88.55</b>    | 102.80 | 76.47  | <b>89.87</b>    | 104.29 | 77.60  |
| Ireland           | <b>108.86</b>   | 120.98 | 97.19  | <b>112.40</b>   | 125.08 | 99.90  | <b>115.21</b>   | 128.82 | 101.75 | <b>115.21</b>   | 128.95 | 100.98 | <b>115.31</b>   | 131.43 | 100.11 | <b>118.40</b>   | 134.37 | 102.59 |
| Italy             | <b>129.36</b>   | 147.55 | 111.79 | <b>128.14</b>   | 146.34 | 110.25 | <b>128.44</b>   | 147.20 | 110.21 | <b>132.65</b>   | 152.71 | 112.82 | <b>137.29</b>   | 158.99 | 116.06 | <b>136.87</b>   | 159.56 | 115.16 |
| Latvia            | <b>81.80</b>    | 95.52  | 69.53  | <b>81.77</b>    | 95.70  | 69.42  | <b>82.13</b>    | 96.51  | 69.28  | <b>86.52</b>    | 102.21 | 73.01  | <b>90.69</b>    | 108.63 | 75.68  | <b>85.89</b>    | 102.84 | 71.37  |
| Luxembourg        | <b>68.45</b>    | 76.27  | 60.76  | <b>68.45</b>    | 76.23  | 60.56  | <b>68.81</b>    | 76.80  | 60.84  | <b>69.83</b>    | 78.41  | 61.23  | <b>70.76</b>    | 80.07  | 61.54  | <b>69.44</b>    | 79.11  | 60.34  |
| Netherlands       | <b>80.03</b>    | 90.73  | 70.05  | <b>81.82</b>    | 92.73  | 71.60  | <b>83.54</b>    | 95.04  | 72.93  | <b>85.16</b>    | 97.18  | 73.85  | <b>86.94</b>    | 100.43 | 74.83  | <b>88.56</b>    | 101.79 | 76.13  |
| Poland            | <b>71.67</b>    | 81.24  | 62.29  | <b>73.28</b>    | 82.83  | 64.22  | <b>74.83</b>    | 84.43  | 65.75  | <b>76.93</b>    | 86.97  | 67.50  | <b>78.78</b>    | 89.31  | 68.79  | <b>79.66</b>    | 90.28  | 69.36  |
| Portugal          | <b>92.36</b>    | 101.93 | 83.28  | <b>94.35</b>    | 104.30 | 84.89  | <b>95.97</b>    | 106.41 | 86.13  | <b>95.65</b>    | 106.12 | 85.34  | <b>95.22</b>    | 106.55 | 84.03  | <b>96.74</b>    | 108.83 | 85.14  |
| Romania           | <b>91.62</b>    | 103.97 | 80.26  | <b>92.48</b>    | 105.99 | 80.91  | <b>93.44</b>    | 107.28 | 81.62  | <b>95.04</b>    | 109.74 | 82.67  | <b>96.81</b>    | 111.49 | 83.36  | <b>98.32</b>    | 113.40 | 84.35  |
| Slovakia          | <b>67.99</b>    | 79.55  | 58.42  | <b>69.67</b>    | 81.51  | 59.87  | <b>71.51</b>    | 83.79  | 61.28  | <b>74.46</b>    | 87.03  | 63.53  | <b>77.18</b>    | 90.96  | 65.22  | <b>78.55</b>    | 92.36  | 66.50  |
| Slovenia          | <b>101.15</b>   | 115.09 | 87.50  | <b>101.39</b>   | 115.46 | 87.63  | <b>102.13</b>   | 116.59 | 88.03  | <b>106.49</b>   | 122.17 | 91.59  | <b>111.00</b>   | 128.96 | 94.92  | <b>109.03</b>   | 127.16 | 92.81  |
| Spain             | <b>134.60</b>   | 147.91 | 121.14 | <b>136.33</b>   | 150.29 | 122.37 | <b>137.69</b>   | 151.76 | 123.45 | <b>138.10</b>   | 151.96 | 123.16 | <b>138.45</b>   | 153.86 | 122.60 | <b>140.84</b>   | 155.83 | 125.22 |
| Sweden            | <b>109.50</b>   | 130.49 | 90.29  | <b>110.23</b>   | 131.33 | 91.12  | <b>111.28</b>   | 132.78 | 91.60  | <b>114.76</b>   | 138.50 | 93.57  | <b>118.01</b>   | 144.54 | 95.17  | <b>117.08</b>   | 143.48 | 93.80  |
| United Kingdom    | <b>139.06</b>   | 158.33 | 121.02 | <b>141.25</b>   | 161.41 | 122.40 | <b>143.16</b>   | 164.07 | 123.68 | <b>144.44</b>   | 166.80 | 123.99 | <b>146.10</b>   | 170.21 | 124.17 | <b>148.85</b>   | 174.38 | 125.46 |
| <b>All Europe</b> | <b>91.35</b>    | 103.69 | 79.83  | <b>92.15</b>    | 104.75 | 80.42  | <b>93.17</b>    | 106.20 | 81.14  | 95.50           | 109.18 | 82.65  | <b>97.77</b>    | 112.85 | 83.85  | <b>97.67</b>    | 112.79 | 83.66  |

CI: confidence interval; LCI: lower CI; UCI: upper CI; GDB: global burden of disease



**Supplementary Material S14:** overall ILDs and sarcoidosis prevalence rates in 2013-2018. The Y-axis reports prevalence rates indicated as number of cases per 100,000 people.

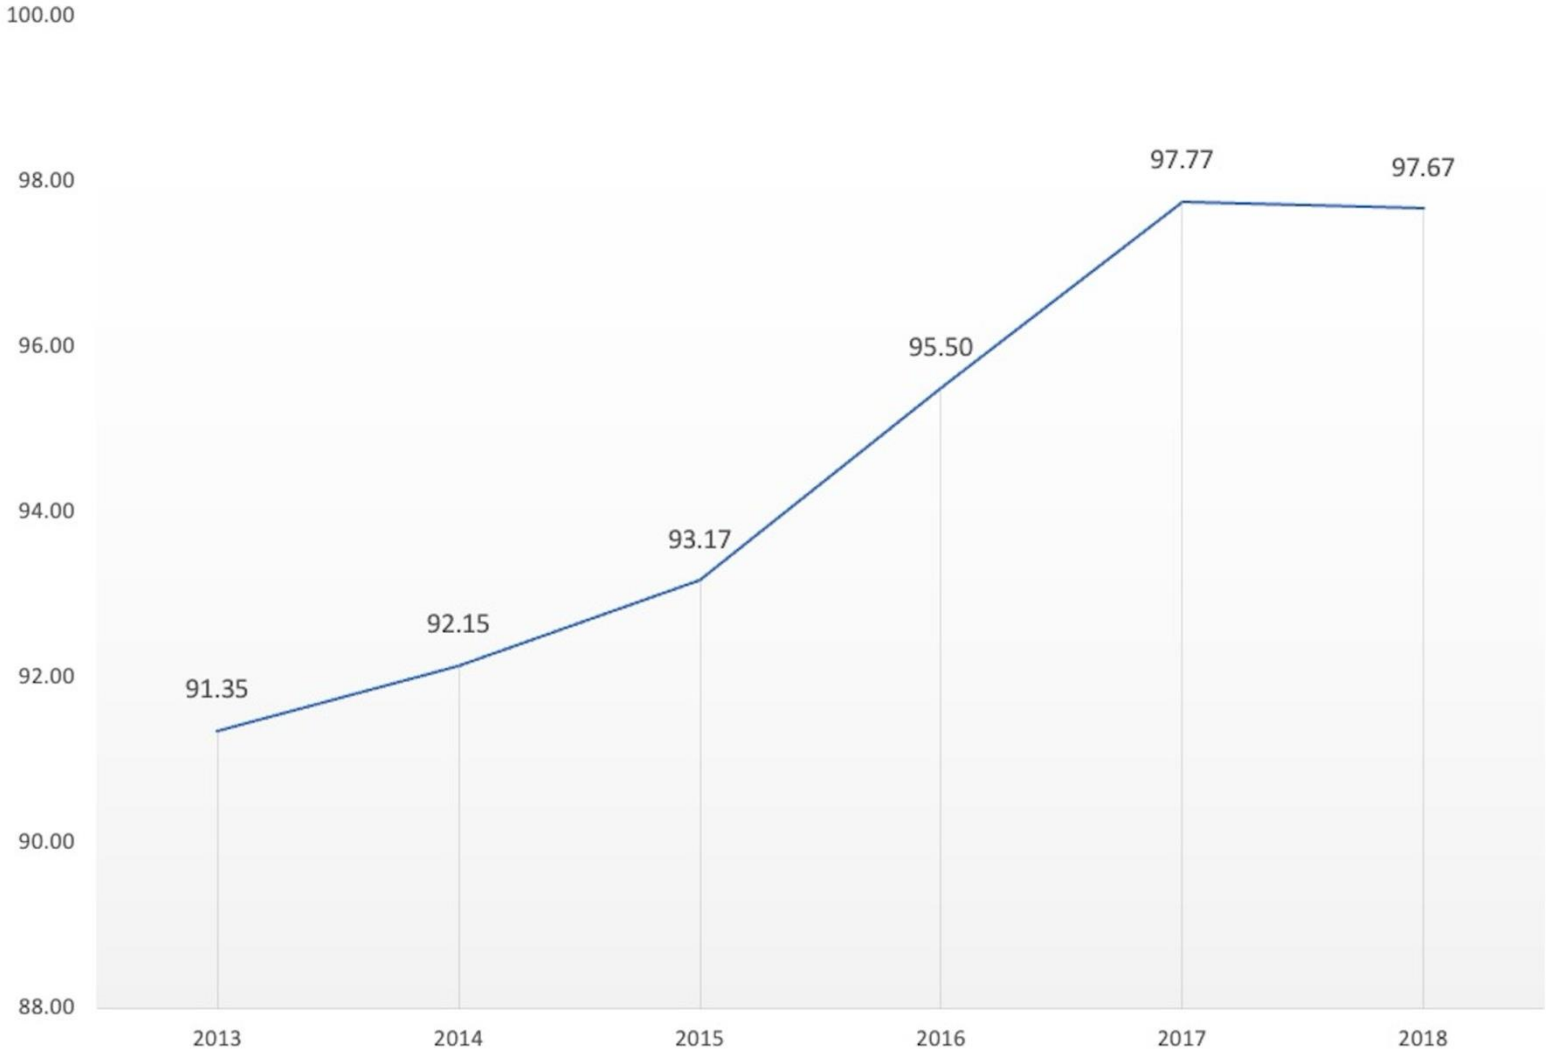

**Supplementary Material S15:** average prevalence rates along with 95% CI and relative belonging quartiles of ILDs and sarcoidosis from 2013-2018 in 24 European Countries (Global Burden of Disease data)

| Country     | Prevalence rate (per 100,000) | 95% CI |        | Quartile |
|-------------|-------------------------------|--------|--------|----------|
|             |                               | LCI    | UCI    |          |
| Austria     | 95.61                         | 92.33  | 100.71 | 3        |
| Belgium     | 92.15                         | 90.26  | 95.37  | 3        |
| Bulgaria    | 62.25                         | 57.91  | 67.62  | 1        |
| Croatia     | 89.52                         | 85.03  | 95.94  | 2        |
| Denmark     | 82.35                         | 82.00  | 83.33  | 2        |
| Estonia     | 67.11                         | 65.07  | 69.46  | 1        |
| Finland     | 122.94                        | 119.09 | 127.46 | 4        |
| France      | 73.89                         | 71.63  | 76.28  | 1        |
| Germany     | 101.89                        | 99.15  | 105.03 | 3        |
| Greece      | 73.81                         | 68.09  | 78.03  | 1        |
| Hungary     | 85.20                         | 81.04  | 89.87  | 2        |
| Ireland     | 114.23                        | 108.86 | 118.40 | 4        |
| Italy       | 132.12                        | 128.14 | 137.29 | 4        |
| Latvia      | 84.80                         | 81.77  | 90.69  | 2        |
| Luxembourg  | 69.29                         | 68.45  | 70.76  | 1        |
| Netherlands | 84.34                         | 80.03  | 88.56  | 2        |
| Poland      | 75.86                         | 71.67  | 79.66  | 2        |
| Portugal    | 95.05                         | 92.36  | 96.74  | 3        |
| Romania     | 94.62                         | 91.62  | 98.32  | 3        |
| Slovenia    | 73.23                         | 67.99  | 78.55  | 3        |
| Slovakia    | 105.20                        | 101.15 | 111.00 | 1        |
| Spain       | 137.67                        | 134.60 | 140.84 | 4        |
| Sweden      | 113.47                        | 109.50 | 118.01 | 4        |
| UK          | 143.81                        | 139.06 | 148.85 | 4        |

CI: confidence interval

**Supplementary Material S16:** Average prevalence rates of ILDs and sarcoidosis in 24 European Countries in 2013-2018 (Global Burden of Disease data). Prevalence rates are displayed according to the quartile of belonging.

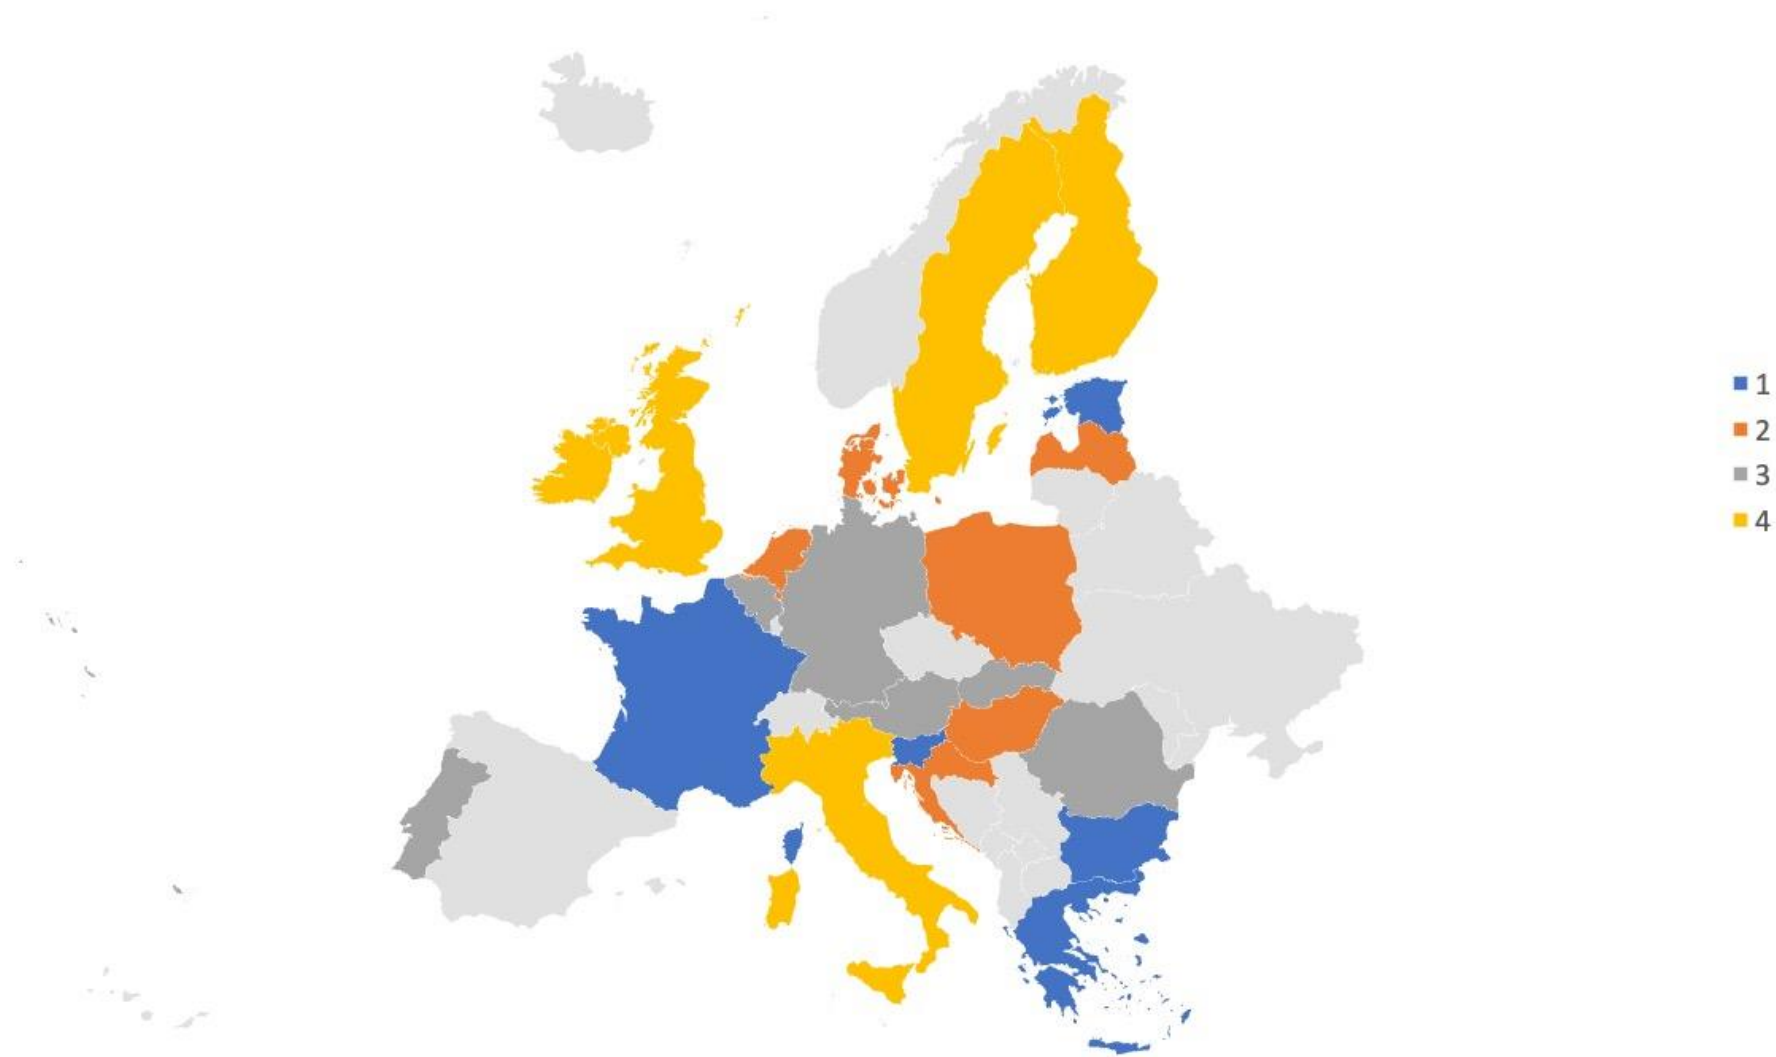

| Supplementary Material S17: annual prevalence rate change for each European Country and overall, along with 95% CI from 2010-2019 (GDB extracted data). |                               |             |             |  |
|---------------------------------------------------------------------------------------------------------------------------------------------------------|-------------------------------|-------------|-------------|--|
| Country                                                                                                                                                 | Annual prevalence rate change | 95% CI      |             |  |
|                                                                                                                                                         |                               | LCI         | UCI         |  |
| Austria                                                                                                                                                 | -0.12*                        | -0.18       | -0.05       |  |
| Belgium                                                                                                                                                 | -0.08                         | -0.16       | 0.01        |  |
| Bulgaria                                                                                                                                                | 0.21                          | 0.14        | 0.29        |  |
| Croatia                                                                                                                                                 | 0.01                          | -0.08       | 0.10        |  |
| Denmark                                                                                                                                                 | 0.03                          | -0.04       | 0.09        |  |
| Estonia                                                                                                                                                 | 0.10*                         | 0.03        | 0.17        |  |
| Finland                                                                                                                                                 | 0.01                          | -0.06       | 0.08        |  |
| France                                                                                                                                                  | 0.12                          | 0.05        | 0.19        |  |
| Germany                                                                                                                                                 | -0.02                         | -0.09       | 0.05        |  |
| Greece                                                                                                                                                  | 0.30*                         | 0.21        | 0.40        |  |
| Hungary                                                                                                                                                 | 0.17*                         | 0.10        | 0.23        |  |
| Ireland                                                                                                                                                 | 0.25*                         | 0.16        | 0.34        |  |
| Italy                                                                                                                                                   | 0.00                          | -0.07       | 0.08        |  |
| Latvia                                                                                                                                                  | -0.10*                        | -0.17       | -0.01       |  |
| Luxembourg                                                                                                                                              | -0.05                         | -0.12       | 0.02        |  |
| Netherlands                                                                                                                                             | 0.21*                         | 0.13        | 0.29        |  |
| Poland                                                                                                                                                  | 0.18*                         | 0.12        | 0.25        |  |
| Portugal                                                                                                                                                | 0.15*                         | 0.09        | 0.21        |  |
| Romania                                                                                                                                                 | 0.12*                         | 0.05        | 0.19        |  |
| Slovakia                                                                                                                                                | 0.25*                         | 0.17        | 0.33        |  |
| Slovenia                                                                                                                                                | 0.02                          | -0.07       | 0.10        |  |
| Spain                                                                                                                                                   | 0.12*                         | 0.05        | 0.18        |  |
| Sweden                                                                                                                                                  | 0.04                          | -0.03       | 0.13        |  |
| United Kingdom                                                                                                                                          | 0.15*                         | 0.08        | 0.23        |  |
| <b>All Europe</b>                                                                                                                                       | <b>0.08</b>                   | <b>0.01</b> | <b>0.16</b> |  |

CI: confidence interval; LCI: lower CI; UCI: upper CI; GDB: global burden of disease
